# Supplementary material for: Tuning of the aggregation number of Platonic micelles with a binary mixture of calix[4]arene surfactants
Source: Royal Society of Chemistry journal article supplement (doi:10.1039/c8cc09621j), 2019-01-01
Supplement: c8cc09621j1.pdf [file c8cc09621j1.pdf]

**【Electronic Supplementary Information】**

Tuning of the aggregation number of platonic micelle  
with binary mixture of calix[4]arene surfactants

*Ji Ha Lee, Shota Fujii, Rintaro Takahashi, Kazuo Sakurai\**

*Department of Chemistry and Biochemistry, University of Kitakyushu, 1-1 Hibikino,  
Kitakyushu, Fukuoka 808-0135, Japan*

E-mail: sakurai@kitakyu-u.ac.jp

## EXPERIMENTAL SECTION

**Critical Micelle Concentration (CMC) Measurements.** The concentration of an aqueous micelle solutions were adjusted to 10 mM, and the solution was diluted with 50 mM aqueous NaCl. The pH of the solution was controlled with 1 M HCl, Tris-HCl buffer, and 1 M NaOH aqueous solutions. Sodium 8-anilino-1-naphthalenesulfonic acid (ANS) was used as a fluorescence probe. The stock solution of ANS was prepared at a concentration of 0.1 mM in water and was then diluted to 10  $\mu$ M in each solution. The fluorescence measurements were carried out with a fluorescence spectrometer (Jasco FP-6600). ANS was excited at 350 nm, and the emission spectra were recorded at 400–700 nm. The scan speed was 240 nm min<sup>-1</sup>. The fluorescence intensity of ANS sensitively reflects the polarity of its environment; therefore, the CMC can be determined from a plot of the fluorescence intensity vs the micelle concentration.

**Small Angle X-ray Scattering (SAXS) Measurements.** Small-angle X-ray scattering (SAXS) measurements were carried out at the BL-40B2 beamline of the SPring-8 facility (Hyogo Prefecture, Japan). A 30  $\times$  30 cm<sup>2</sup> imaging plate (Rigaku R-Axis VII) detector was placed 1 m from the sample. The wavelength of the incident beam ( $\lambda$ ) was adjusted to 0.10 nm. This setup provided a  $q$  range of 0.20–4 nm<sup>-1</sup>, where  $q$  is the magnitude of the scattering vector, defined as  $q = 4\pi \sin \theta / \lambda$ , with a scattering angle of  $2\theta$ . The X-ray transmittance of the samples was determined by using ion chambers located in front of and behind the sample.

**Determination of Micellar Molar Mass by SAXS.** The weight average molar mass of the micelles can be given by the following equation ;

$$M_w = I(0) \{ N_A c (\Delta \rho v)^2 \}$$

where  $M_w$  is the weight-average molar mass,  $c$  is the concentration of lipids,  $N_A$  is Avogadro's number, and  $\Delta \rho$  is the scattering length difference, which can be calculated from the electron number and the molecular weight of the lipid and the solvent. The term  $v$  indicates the partial specific volume of the micelles in the solution, which can be determined by the density of the micellar solutions and the solvent

**Analytical Ultracentrifugation (AUC).** Sedimentation equilibria of micells in 50 mM NaCl were studied in a Beckman Optima XL-1 ultracentrifuge at 25 °C. A 12 mm double-sector cell was used, and the liquid column was adjusted to 2.0 mm. The rotor speeds were set at  $2.0 \times 10^4$  rpm. The apparent weight-average molecular weight  $M_{app,w}^{-1}$  and  $Q (=M_{app,w}/M_{app,z})$  were determined by analyzing the Rayleigh fringe according to the established method.

**Atomic Force Microscopy (AFM) Observations.** A PPPNCHR 10 M cantilever (Park Systems) was used to observe the AFM images. Before AFM observation, the sample was spin-coated with 1500 rpm onto a freshly cleaved Muscovite Mica. The AFM images were recorded with a resolution of 1024  $\times$  1024 pixels on the AFM operation in tapping mode in air at room temperature (RT) by using moderate scan rates (0.3 Hz).

**Table S1** Fitting parameter of binary mixtures.

|                       | $\alpha$ | $R_g$<br>/nm | model  | $R_c$ /nm | $R_s$ /nm | $R_s - R_c$<br>/nm | $\rho_c/e$<br>$\text{nm}^{-1}$ | $\rho_s/e$<br>$\text{nm}^{-1}$ |
|-----------------------|----------|--------------|--------|-----------|-----------|--------------------|--------------------------------|--------------------------------|
| SC5                   | 0        | 1.79         | Sphere | 0.85      | 2.3       | 1.45               | 272                            | 363                            |
| QA7_5%<br>in SC5      | 0        | 1.88         | Sphere | 0.9       | 2.5       | 1.6                | 270                            | 365                            |
| QA7_10<br>% in<br>SC5 | 0        | 2.04         | Sphere | 0.95      | 2.6       | 1.65               | 270                            | 365                            |

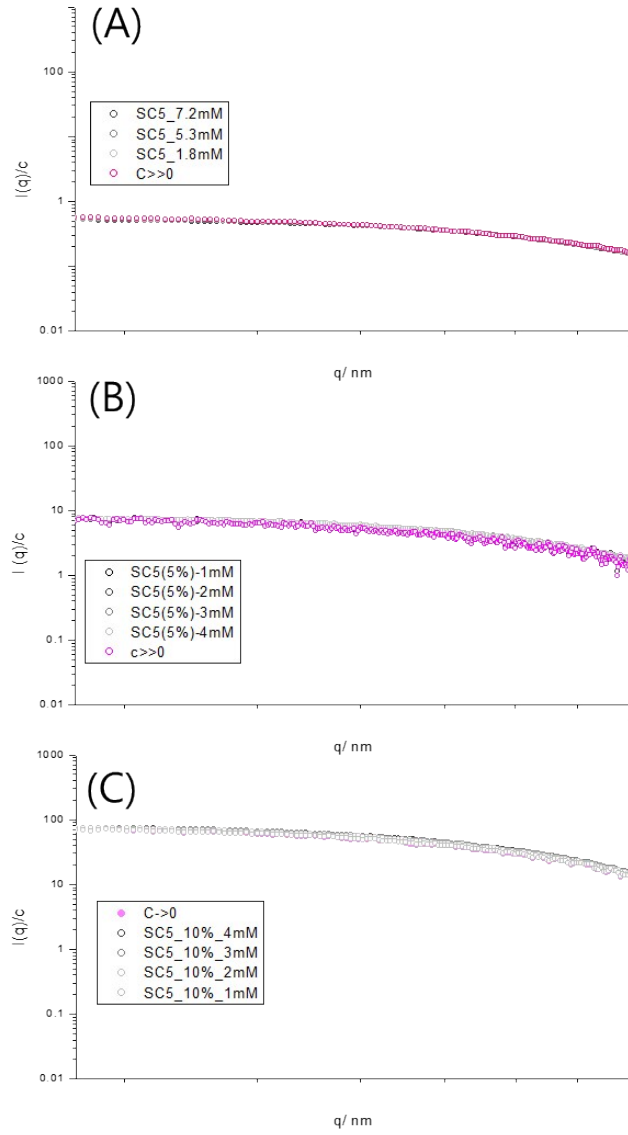

**Fig. S1**  $I(q)/c$  as a function of  $q$  for different concentrations in 50 mM aqueous NaCl ; (A) SC5, (B) 5% of QA7 in SC5 and (C) 10% of QA7 in SC5.

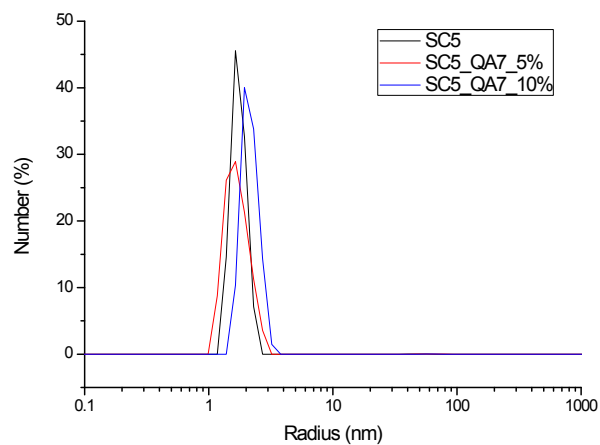

**Fig. S2** DLS measurement of micelles; SC5, 5% of QA7 and 10% of QA7 in SC5.

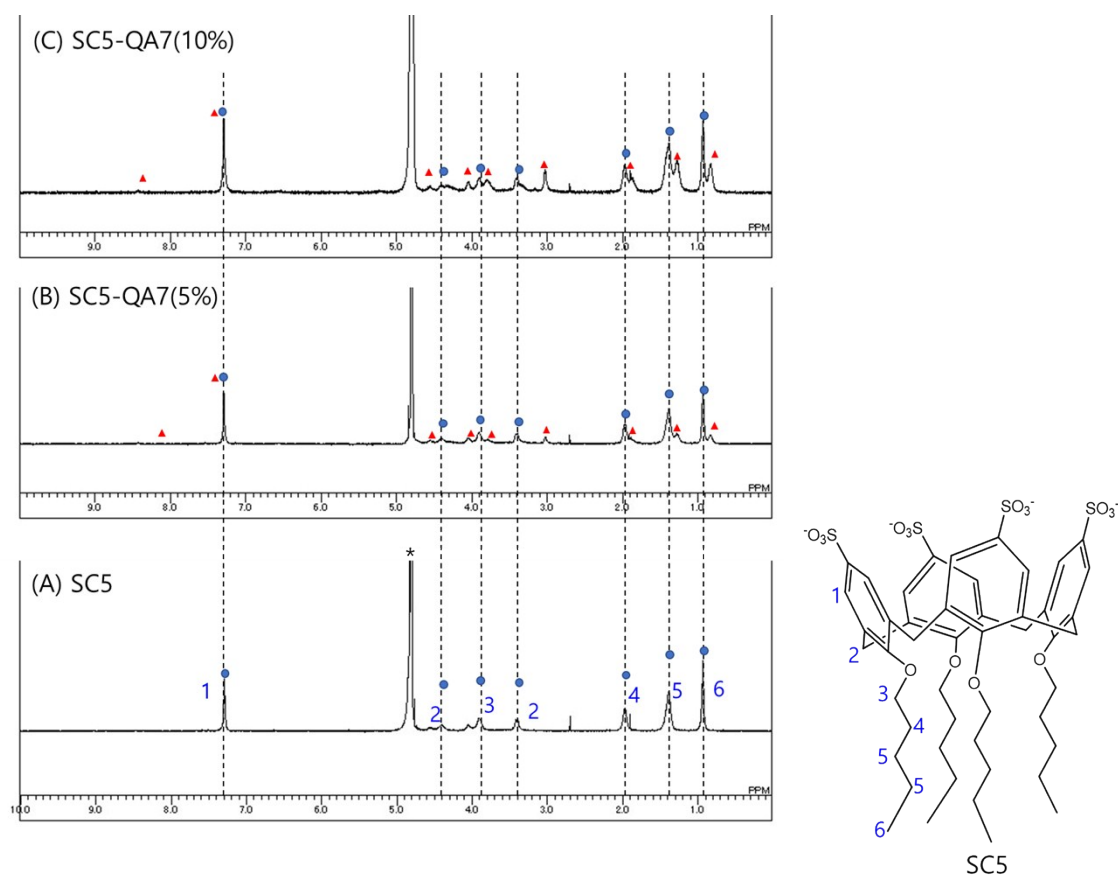

**Fig S3.** NMR measurement of (A) SC5, (B) SC5-QA7 (5%) and (C) SC5-QA7 (10%); blue symbol: peaks from SC5, red symbol: peaks from QA7.

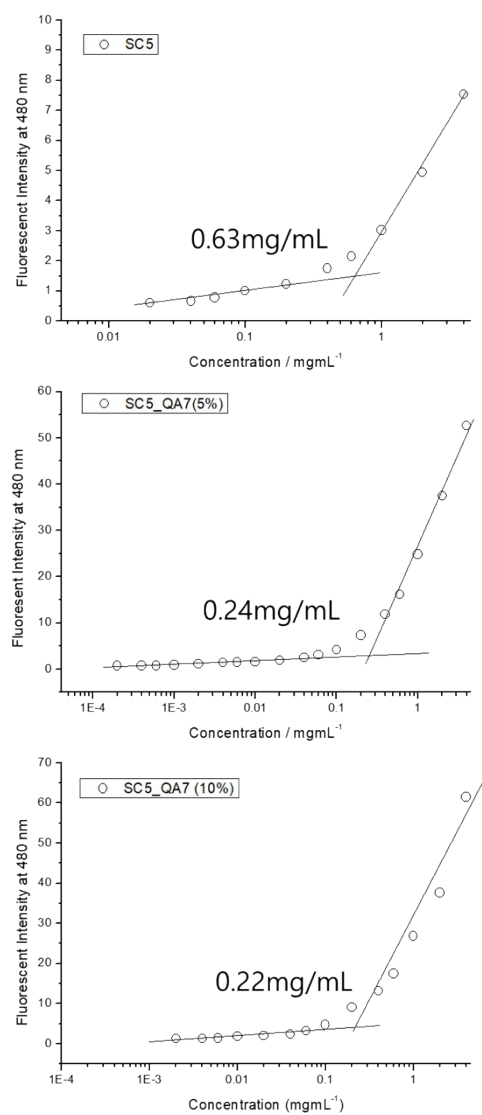

**Fig. S4** CMC measurement of micelles; SC5, 5% of QA7 and 10% of QA7 in SC5.
